# Supplementary material for: Cosmetic Treatment Using Botulinum Toxin in the Oral and Maxillofacial Area: A Narrative Review of Esthetic Techniques
Source: MDPI journal article supplement (doi:10.3390/toxins15020082), 2023-01-17
Supplement: s1 [file s1]

**Table S1.** List of 27 consensus recommendation papers retrieved for the literature review. Three studies using abotulinumtoxinA were excluded from the review.

|    | Authors                  | Year | Title                                                                                                                                                                                                                                                                       | BoNT type                              |
|----|--------------------------|------|-----------------------------------------------------------------------------------------------------------------------------------------------------------------------------------------------------------------------------------------------------------------------------|----------------------------------------|
| 1  | Carruthers et al. [33]   | 2004 | Consensus recommendations on the use of botulinum toxin type a in facial aesthetics                                                                                                                                                                                         | onabotulinumtoxinA                     |
| 2  | Carruthers et al. [34]   | 2008 | Advances in facial rejuvenation: botulinum toxin type a, hyaluronic acid dermal fillers, and combination therapies-- consensus recommendations                                                                                                                              | onabotulinumtoxinA                     |
| 3  | Carruthers et al. [35]   | 2013 | The convergence of medicine and neurotoxins: a focus on botulinum toxin type A and its application in aesthetic medicine-- a global, evidence-based botulinum toxin consensus education initiative: part II: incorporating botulinum toxin into aesthetic clinical practice | onabotulinumtoxinA                     |
| 4  | Fagien & Raspaldo [31]   | 2007 | Facial rejuvenation with botulinum neurotoxin: an anatomical and experiential perspective                                                                                                                                                                                   | onabotulinumtoxinA                     |
| 5  | Raspaldo et al. [39]     | 2011 | Upper- and mid-face anti-aging treatment and prevention using onabotulinumtoxin A: the 2010 multidisciplinary French consensus--part 1                                                                                                                                      | onabotulinumtoxinA                     |
| 6  | Raspaldo et al. [38]     | 2011 | Lower-face and neck antiaging treatment and prevention using onabotulinumtoxin A: the 2010 multidisciplinary French consensus--part 2                                                                                                                                       | onabotulinumtoxinA                     |
| 7  | Raspaldo et al. [36]     | 2012 | Global, 3-dimensional approach to natural rejuvenation: part 1 - recommendations for volume restoration and the periocular area                                                                                                                                             | onabotulinumtoxinA                     |
| 8  | Gassia et al. [37]       | 2013 | Global 3-dimensional approach to natural rejuvenation: recommendations for perioral, nose, and ear rejuvenation                                                                                                                                                             | onabotulinumtoxinA                     |
| 9  | Maas et al. [54]         | 2012 | Current aesthetic use of abobotulinumtoxinA in clinical practice: an evidence-based consensus review                                                                                                                                                                        | abobotulinumtoxinA &onabotulinumtoxinA |
| 10 | Imhof et al. [88]        | 2013 | S1 guideline aesthetic botulinum toxin therapy                                                                                                                                                                                                                              | onabotulinumtoxinA                     |
| 11 | Lorenc et al. [87]       | 2013 | Consensus panel's assessment and recommendations on the use of 3 botulinum toxin type A products in facial aesthetics                                                                                                                                                       | onabotulinumtoxinA                     |
| 12 | De Maio et al. [59]      | 2017 | Facial assessment and injection guide for botulinum toxin and injectable Hyaluronic Acid fillers: focus on the upper face                                                                                                                                                   | onabotulinumtoxinA                     |
| 13 | De Maio et al. [60]      | 2017 | Facial assessment and injection guide for botulinum toxin and injectable hyaluronic Acid fillers: focus on the midface                                                                                                                                                      | onabotulinumtoxinA                     |
| 14 | De Maio et al. [71]      | 2017 | Facial assessment and injection guide for botulinum toxin and injectable Hyaluronic Acid fillers: focus on the lower face                                                                                                                                                   | onabotulinumtoxinA                     |
| 15 | Ahn et al. [27]          | 2013 | Consensus recommendations on the aesthetic usage of botulinum toxin type A in Asians                                                                                                                                                                                        | Medytox                                |
| 16 | Yutskovskaya et al. [43] | 2015 | IncobotulinumtoxinA in aesthetics: Russian multidisciplinary expert consensus recommendations                                                                                                                                                                               | incobotulinumtoxinA                    |
| 17 | Wu et al. [30]           | 2016 | Consensus on current injectable treatment strategies in the Asian face                                                                                                                                                                                                      | onabotulinumtoxinA                     |
| 18 | Kapoor et al. [29]       | 2017 | Consensus recommendations for treatment strategies in Indians using botulinum toxin and                                                                                                                                                                                     | onabotulinumtoxinA                     |

|    |                       |      |                                                                                                                                                                                    |                     |
|----|-----------------------|------|------------------------------------------------------------------------------------------------------------------------------------------------------------------------------------|---------------------|
|    |                       |      | Hyaluronic Acid fillers                                                                                                                                                            |                     |
| 19 | Sundaram et al. [83]  | 2016 | Global aesthetics consensus: Botulinum toxin type A--evidence-based review, emerging concepts, and consensus recommendations for aesthetic use, including updates on complications | onabotulinumtoxinA  |
| 20 | Sundaram et al. [84]  | 2016 | Global aesthetics consensus: Hyaluronic Acid fillers and botulinum toxin type A-recommendations for combined treatment and optimizing outcomes in diverse patient populations      | onabotulinumtoxinA  |
| 21 | Sundaram et al. [28]  | 2016 | Aesthetic applications of botulinum toxin A in Asians: an international, multidisciplinary, Pan-Asian consensus                                                                    | incobotulinumtoxinA |
| 22 | Kaminer et al. [86]   | 2020 | Re-examining the optimal use of neuromodulators and the changing landscape: a consensus panel update                                                                               | onabotulinumtoxinA  |
| 23 | Bertossi et al. [32]  | 2018 | Italian consensus report on the aesthetic use of onabotulinum toxin A                                                                                                              | onabotulinumtoxinA  |
| 24 | Signorini et al. [85] | 2022 | OnabotulinumtoxinA from lines to facial reshaping: A new Italian consensus report                                                                                                  | onabotulinumtoxinA  |
| 25 | Ascher et al. [42]    | 2010 | International consensus recommendations on the aesthetic usage of botulinum toxin type A (Speywood Unit)-Part I: upper facial wrinkles                                             | abobotulinumtoxinA  |
| 26 | Ascher et al. [40]    | 2010 | International consensus recommendations on the aesthetic usage of botulinum toxin type A (Speywood Unit)-Part II: wrinkles on the middle and lower face, neck and chest            | abobotulinumtoxinA  |
| 27 | Kane et al. [41]      | 2010 | Expanding the use of neurotoxins in facial aesthetics: a consensus panel's assessment and recommendations                                                                          | abobotulinumtoxinA  |
